# Supplementary material for: Versatility in self-assembly and morphology of non-coded anthranilic acid and phenylglycine based dipeptide stereoisomers
Source: Royal Society of Chemistry journal article supplement (doi:10.1039/d2ce00158f), 2022-01-01
Supplement: d2ce00158f1.pdf [file d2ce00158f1.pdf]

## **Supporting Information**

# **Versatility in Self-assembly and Morphology of Non-Coded Anthranilic acid and Phenylglycine based Dipeptide Stereoisomers**

Gobinda Dolai, Rajat Subhra Giri and Bhubaneswar Mandal\*

Department of Chemistry, Laboratory of Peptide and Amyloid Research, Indian Institute of Technology Guwahati, Assam- 781039, India.

E-mail: [bmandal@iitg.ac.in](mailto:bmandal@iitg.ac.in)

## Table of contents

| Sl. no | contents                                                      | Page no |
|--------|---------------------------------------------------------------|---------|
| 1      | Synthetic scheme for dipeptides                               | S3      |
| 2.     | Table S1: Backbone torsion angle list                         | S3      |
| 3.     | Table S2: Chemical shifts values <sup>1</sup> H-NMR titration | S4      |
| 4.     | <sup>1</sup> H-NMR titration plot of peptide 1                | S5      |
| 5.     | <sup>1</sup> H-NMR titration plot of peptide 2                | S6      |
| 6.     | <sup>1</sup> H-NMR titration plot of peptide 3                | S7      |
| 7.     | <sup>1</sup> H-NMR titration plot of peptide 4                | S8      |
| 8.     | CD-spectra of all peptide                                     | S9      |
| 9      | FESEM images of dipeptides                                    | S10     |
| 10     | FETEM images of dipeptides                                    | S10     |
| 11     | 3D AFM images of dipeptides                                   | S11     |
| 12     | Spectra of peptide <b>1</b> (Figure. S13-S16)                 | S12-S13 |
| 13     | Spectra of peptide <b>2</b> (Figure. S17-S20)                 | S14-S15 |
| 14     | Spectra of peptide <b>3</b> (Figure. S21-S24)                 | S16-S17 |
| 15     | Spectra of peptide <b>4</b> (Figure. S25-S28)                 | S18-S19 |

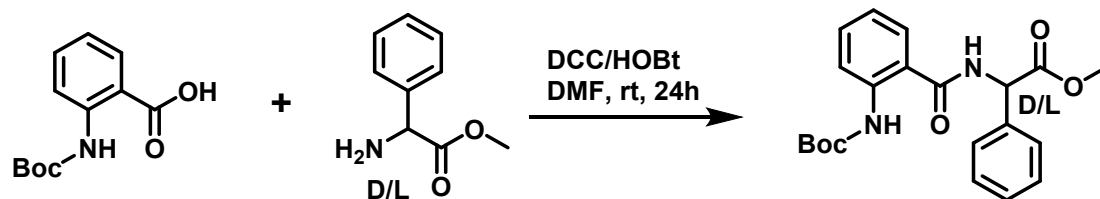

**Figure S1.** Schematic presentation of synthesis of di-peptide 1 and 2

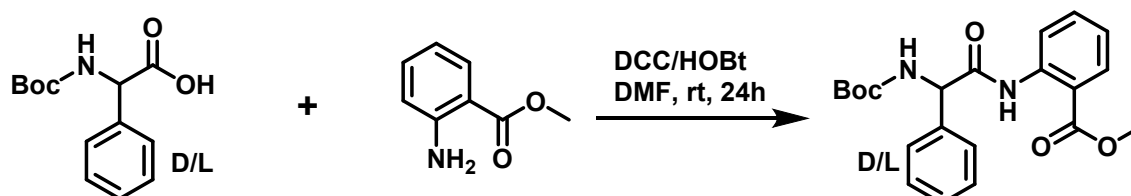

**Figure S2.** Schematic presentation of synthesis of di-peptide 3 and 4

**Table S1:** Selected backbone torsion angles ( $^{\circ}$ ) of peptide

| peptide          | $\omega_0$                     | $\omega_1$                     | $\phi_1$                             | $\phi_2$                        | $\psi_1$                          | $\psi_2$                         | $\theta_1$                           |                                    |
|------------------|--------------------------------|--------------------------------|--------------------------------------|---------------------------------|-----------------------------------|----------------------------------|--------------------------------------|------------------------------------|
| <b>Peptide 1</b> | N1-C5-<br>O1-C2 =<br>-177.0(2) | C6-N1-<br>C5-O1 =<br>170.5(3)  | C13-N2-<br>C12-C11<br>=<br>178.3(3)  | C11-C6-<br>N1-C5 =<br>-169.0(3) | C20-C13-<br>N2-C12 =<br>-63.9(3)  | N2-C12-<br>C11-C6 =<br>-148.9(3) | O5-C20-<br>C13-N2 =<br>156.2(3)      | N1-C6-<br>C11-C12<br>=<br>-6.7(4)  |
| <b>Peptide 2</b> | N1-C5-<br>O1-C2 =<br>177.6(2)  | C6-N1-<br>C5-O1 =<br>-170.5(2) | C13-N2-<br>C12-C11<br>=-<br>178.4(2) | C11-C6-<br>N1-C5 =<br>-169.6(2) | C20-C13-<br>N2-C12 =<br>63.9(2)   | N2-C12-<br>C11-C6 =<br>-148.5(2) | O5-C20-<br>C13-N2 =<br>-156.4(2)     | N1-C6-<br>C11-C12<br>=<br>6.7(3)   |
| <b>Peptide 3</b> | N1-C5-<br>O1-C1 =<br>-171.7(3) | C6-N1-<br>C5-O1 =<br>175.4(3)  | C14-N2-<br>C13-C6 =<br>178.6(3)      | C13-C6-<br>N1-C5 =<br>-108.2(3) | C19-C14-<br>N2-C13 =<br>162.9(3)  | N2-C13-<br>C6-N1 =<br>147.3(3)   | O5-C20-<br>C19-C14<br>=-<br>177.2(3) | N2-C14-<br>C19-C20<br>=<br>4.0(5)  |
| <b>Peptide 4</b> | N1-C5-<br>O1-C1 =<br>171.8(3)  | C6-N1-<br>C5-O1 =<br>-175.4(2) | C14-N2-<br>C13-C6 =<br>-178.6(2)     | C13-C6-<br>N1-C5 =<br>108.4(3)  | C19-C14-<br>N2-C13 =<br>-162.9(3) | N2-C13-<br>C6-N1 =<br>-147.4(2)  | O5-C20-<br>C19-C14<br>=<br>177.0(2)  | N2-C14-<br>C19-C20<br>=<br>-4.0(4) |

**Table S2:** Chemical shift  $\delta$  (ppm) of hydrogen bonded protons with addition of DMSO- $d_6$ 

| <b>Peptide 1</b>                                 |          |          |          |           |           |           |           |
|--------------------------------------------------|----------|----------|----------|-----------|-----------|-----------|-----------|
| <b>DMSO-<math>d_6</math> (<math>\mu</math>L)</b> | <b>0</b> | <b>4</b> | <b>8</b> | <b>12</b> | <b>16</b> | <b>20</b> | <b>24</b> |
| NH-Phg                                           | 7.189    | 7.332    | 7.434    | 7.580     | 7.682     | 7.794     | 7.873     |
| NH-Ant                                           | 10.049   | 10.053   | 10.060   | 10.063    | 10.072    | 10.075    | 10.081    |
| <b>Peptide 2</b>                                 |          |          |          |           |           |           |           |
| NH-Phg                                           | 7.183    | 7.328    | 7.433    | 7.611     | 7.732     | 7.850     | 7.934     |
| NH-Ant                                           | 10.048   | 10.055   | 10.060   | 10.063    | 10.071    | 10.081    | 10.086    |
| <b>Peptide 3</b>                                 |          |          |          |           |           |           |           |
| NH-Phg                                           | 5.814    | 5.832    | 5.861    | 5.883     | 5.919     | 5.968     | 6.005     |
| NH-Ant                                           | 11.500   | 11.507   | 11.518   | 11.522    | 11.526    | 11.539    | 11.543    |
| <b>Peptide 4</b>                                 |          |          |          |           |           |           |           |
| NH-Phg                                           | 5.813    | 5.836    | 5.864    | 5.879     | 5.906     | 5.940     | 5.962     |
| NH-Ant                                           | 11.500   | 11.510   | 11.521   | 11.524    | 11.529    | 11.538    | 11.539    |

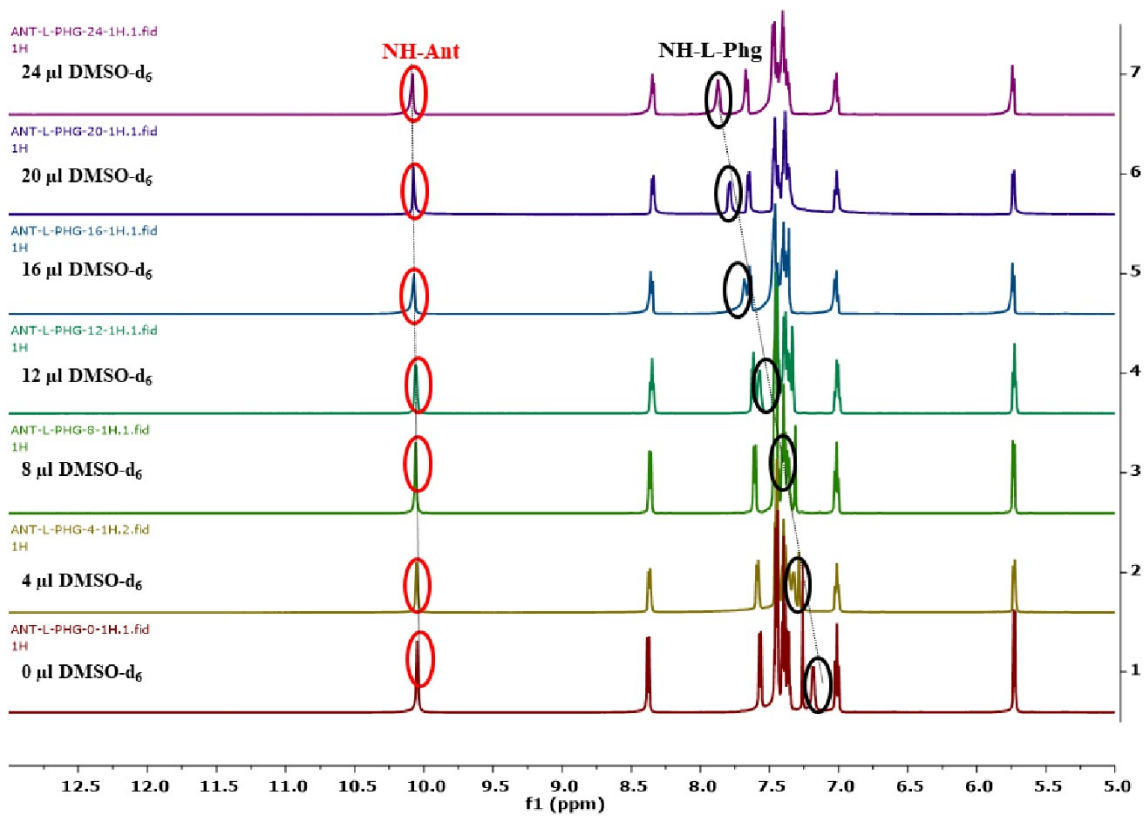

**Figure S3:** Partial titration spectra of peptide 1 in CDCl<sub>3</sub> with DMSO-d<sub>6</sub>.

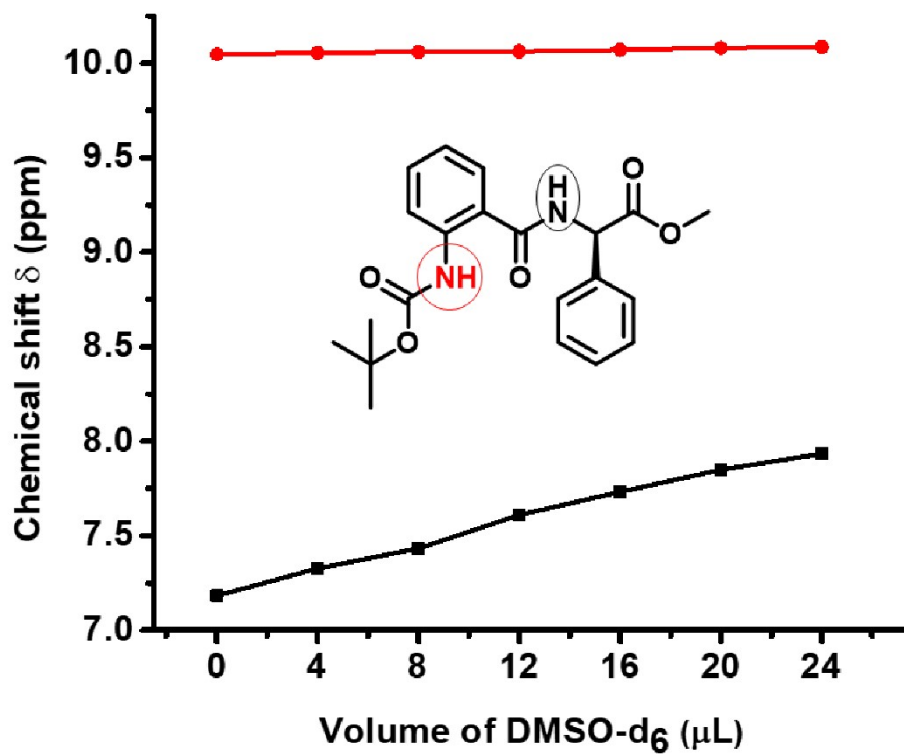

Figure S4: Solvent dependent <sup>1</sup>H-NMR titration of peptide 2.

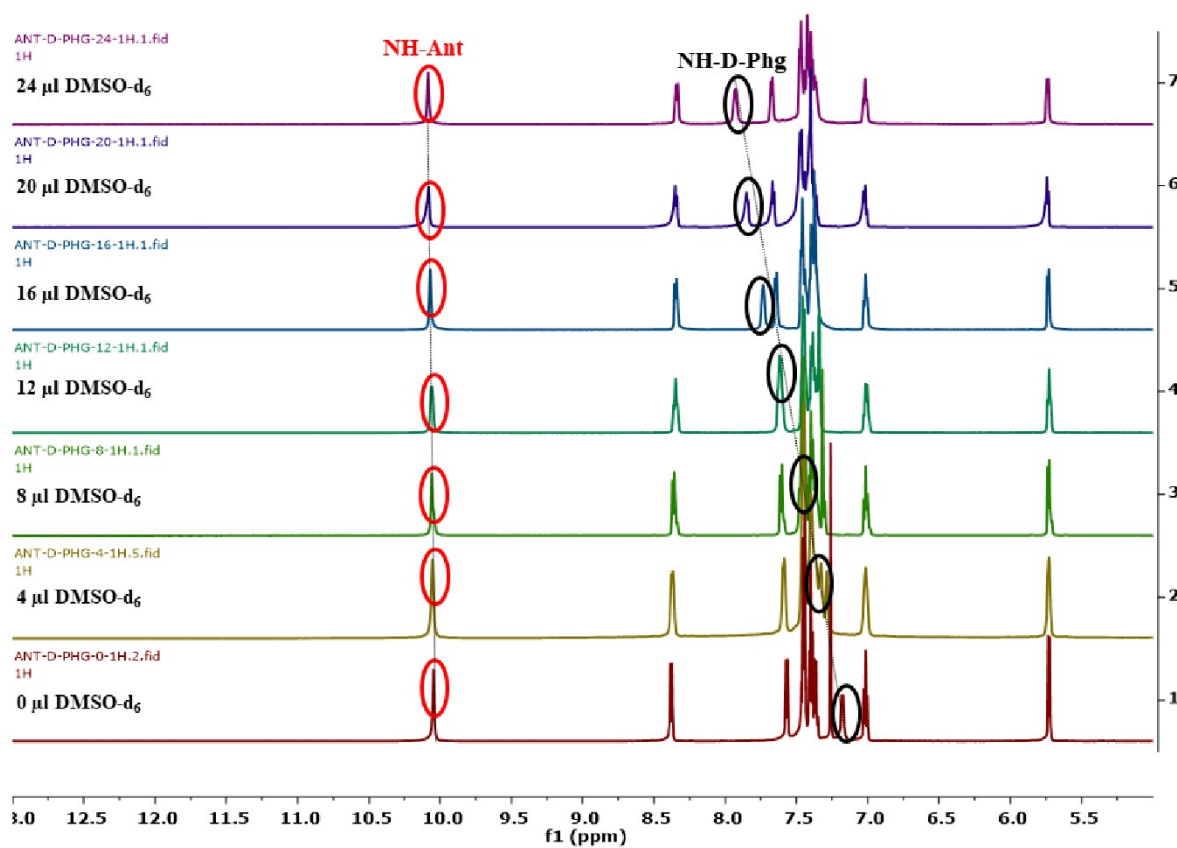

Figure S5: Partial titration spectra of peptide 2 in CDCl<sub>3</sub> with DMSO-d<sub>6</sub>.

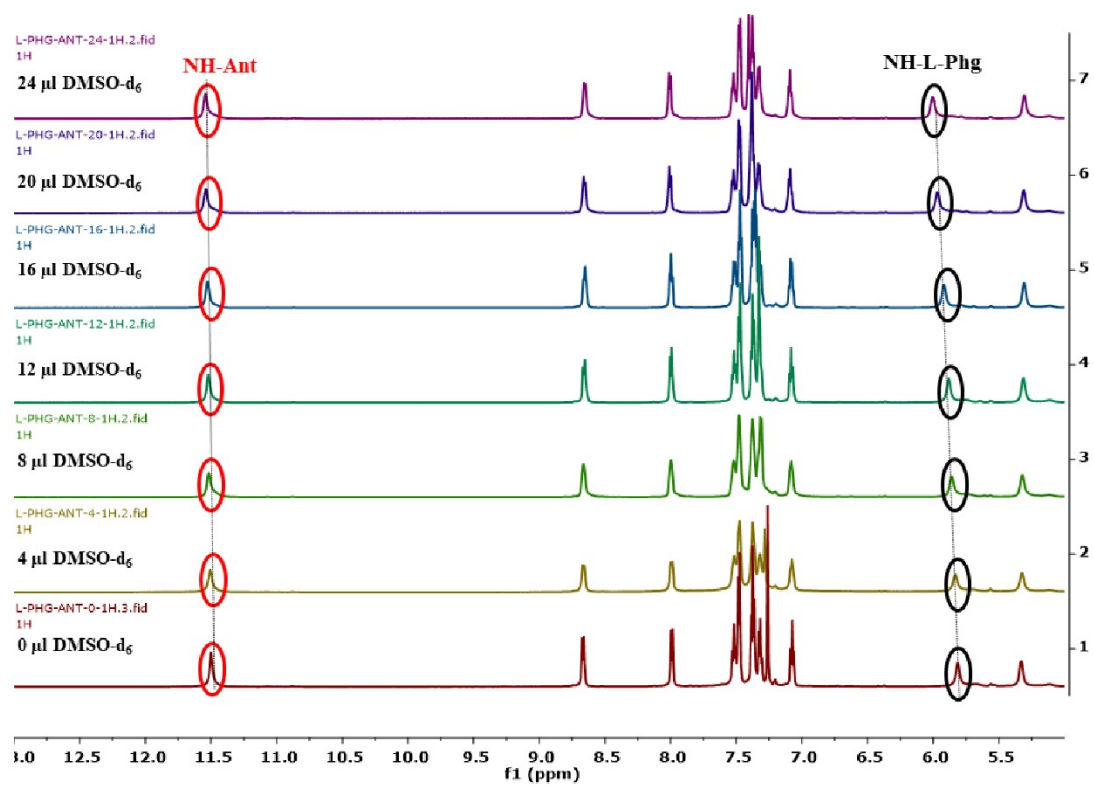

**Figure S6:** Partial titration spectra of peptide **3** in  $\text{CDCl}_3$  with  $\text{DMSO-}d_6$ .

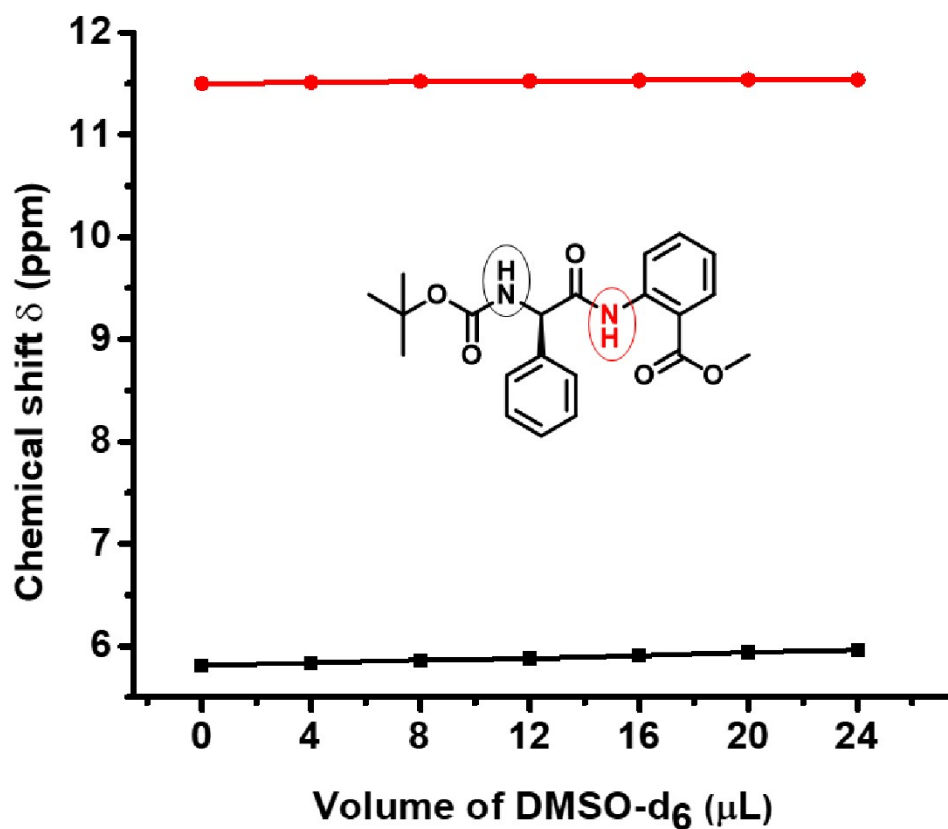

Figure S7: Solvent dependent  $^1\text{H-NMR}$  titration of peptide 4.

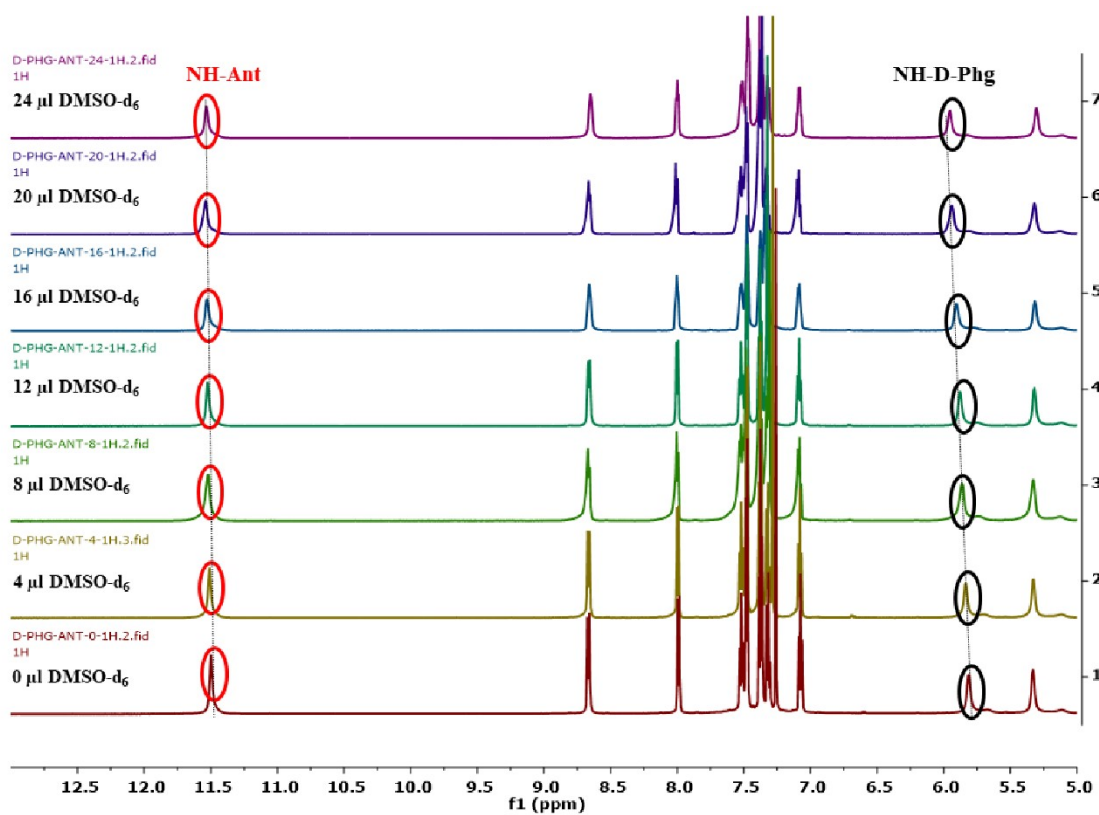

Figure S8: Partial titration spectra of peptide 4 in  $\text{CDCl}_3$  with DMSO- $d_6$ .



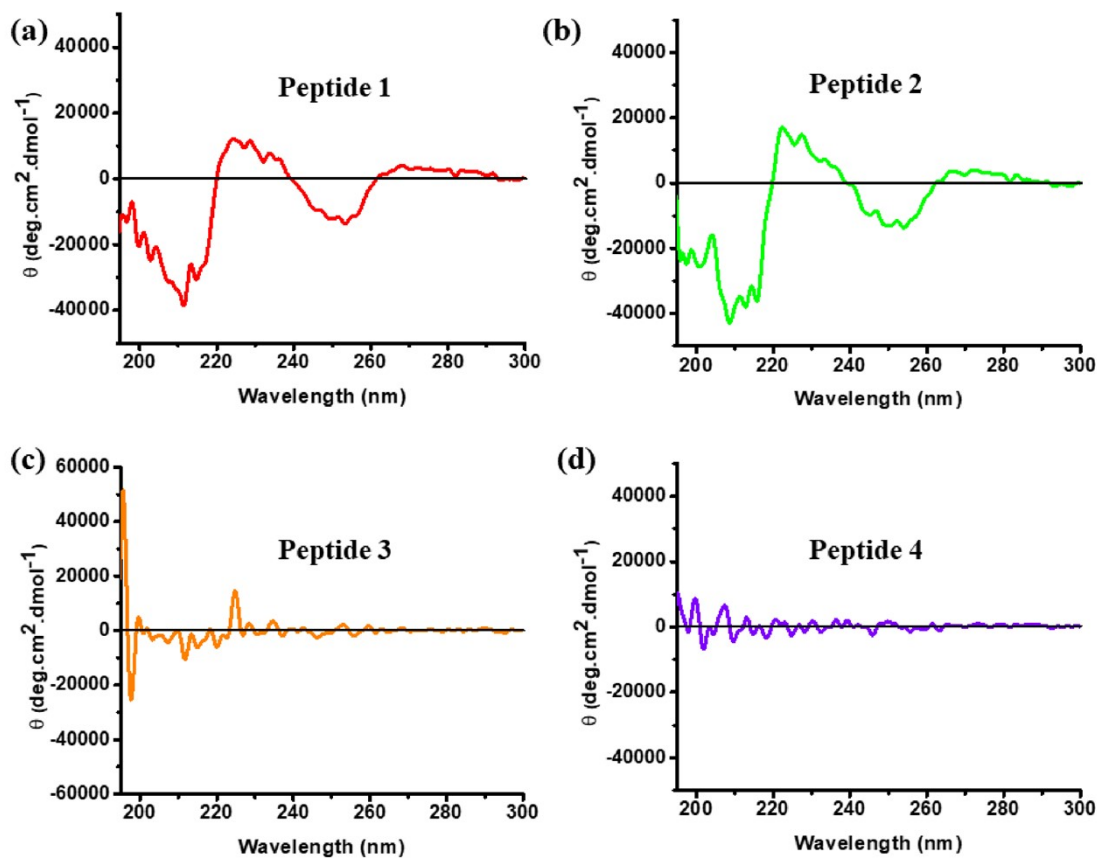

**Figure S9:** (a, b, c, d) represents CD spectra of 375  $\mu\text{M}$  peptide solution of 1, 2, 3 and 4, respectively in methanol.

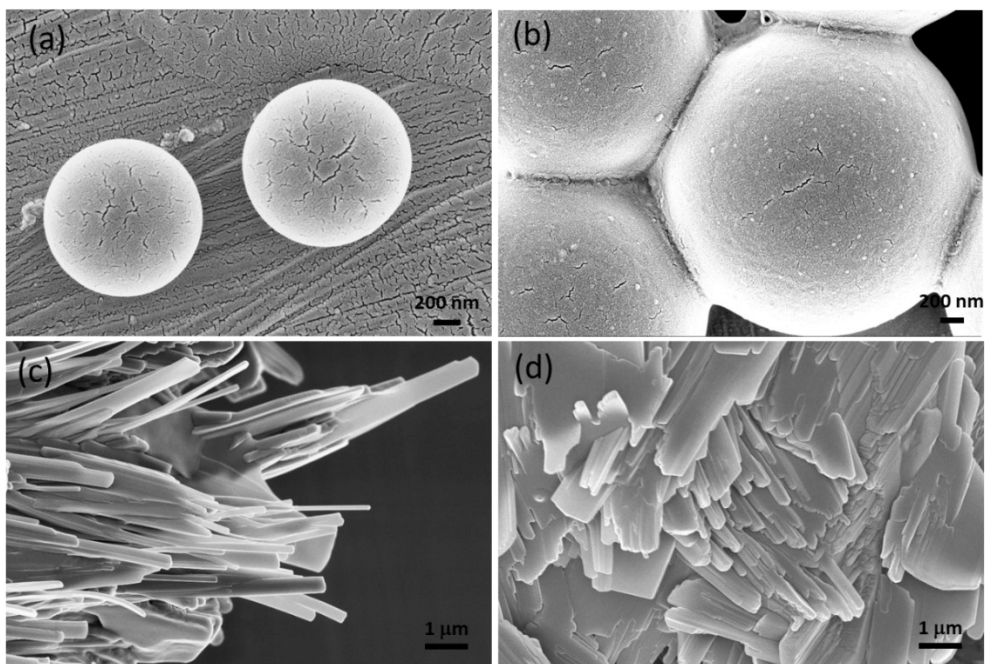

**Figure S10.** a, b, c, and d displays high-resolution FE-SEM images of peptides 1, 2, 3, and 4, respectively.

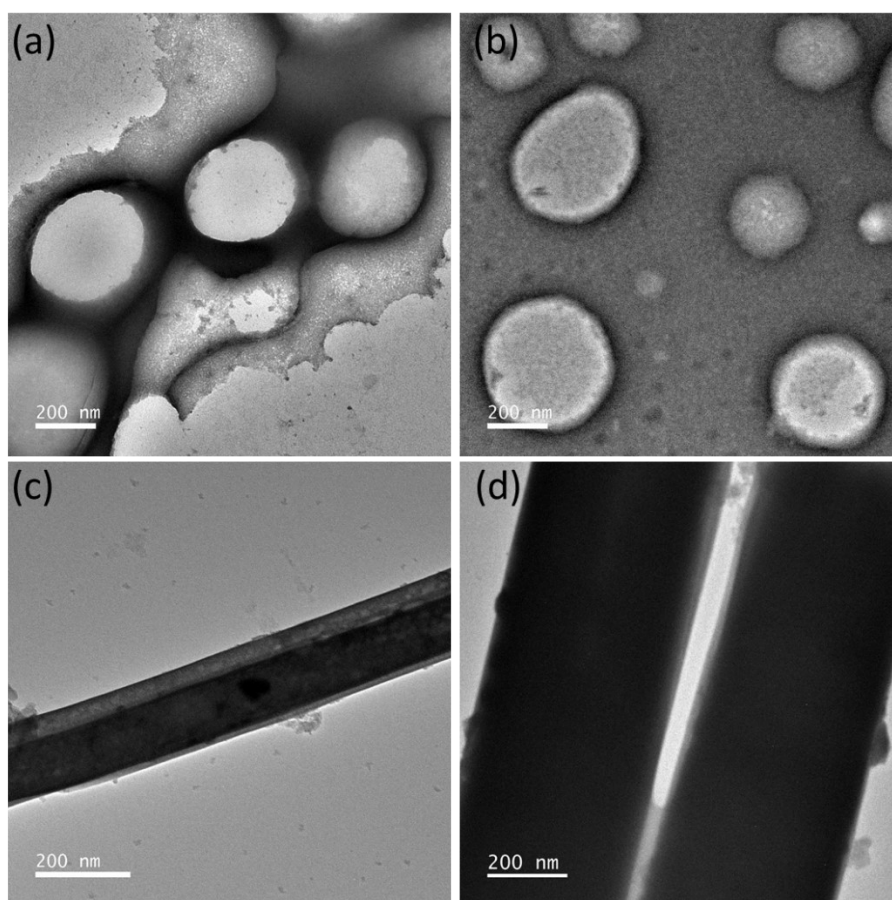

**Figure S11.** a, b, c, and d exhibits high-resolution FETEM images of peptides 1, 2, 3, and 4, respectively.

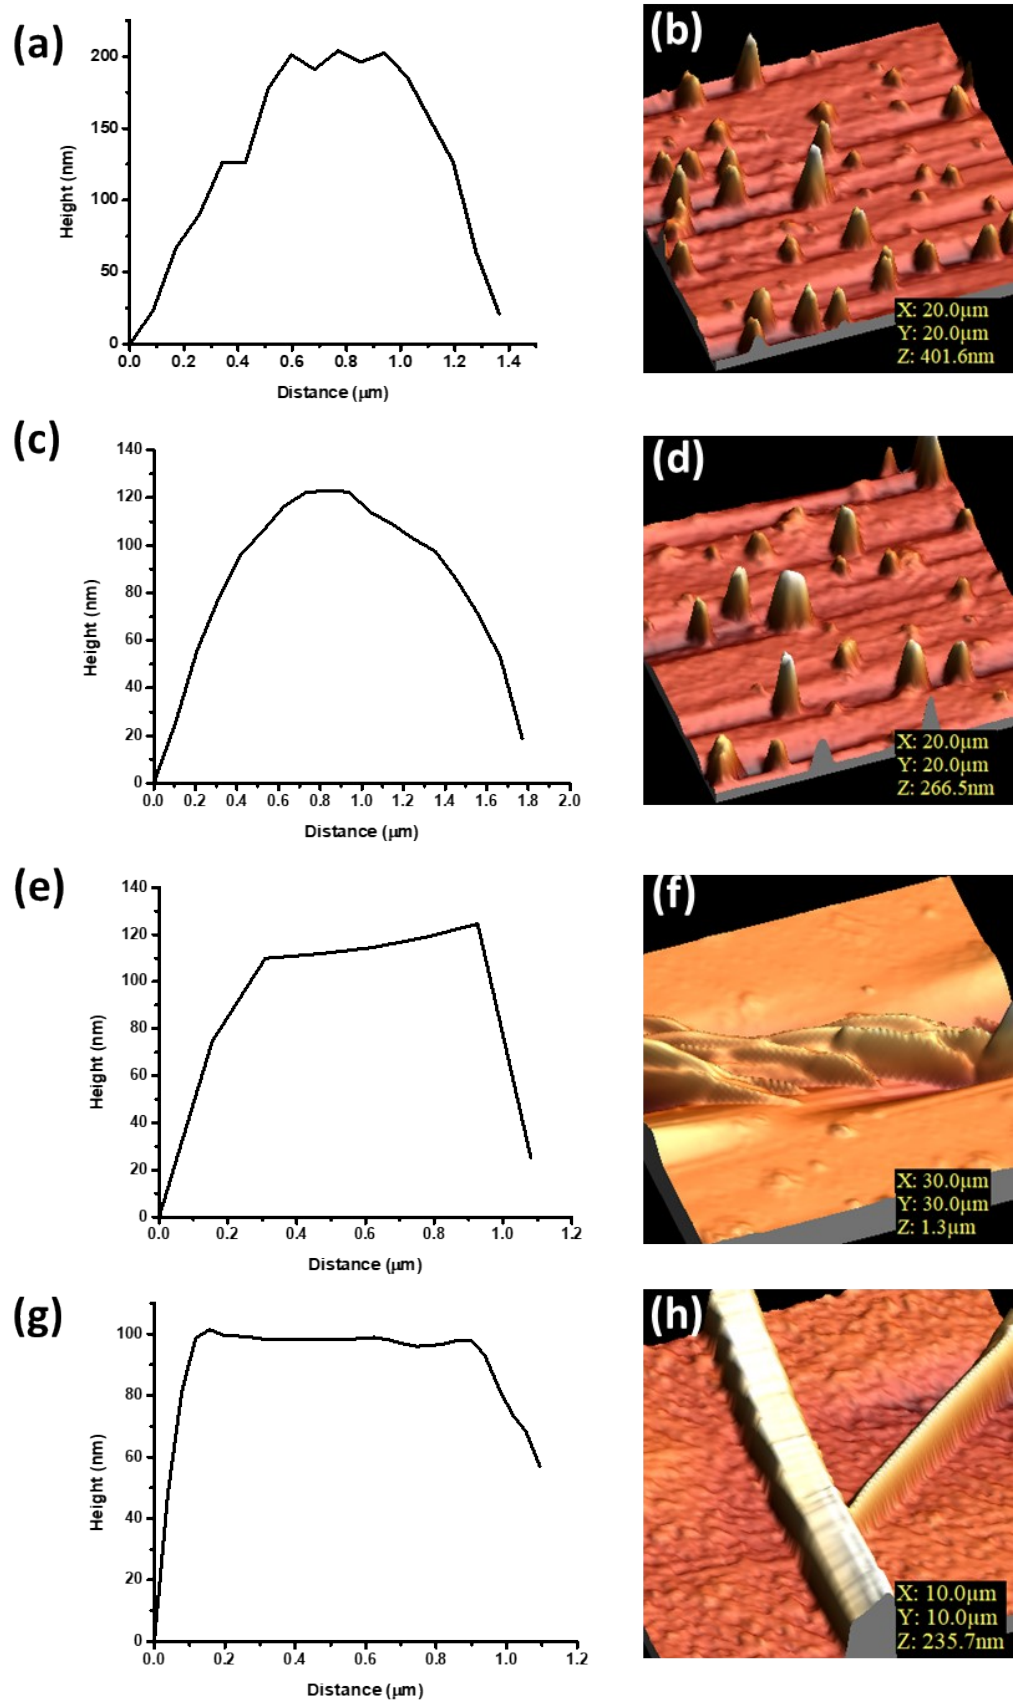

**Figure S12.** (a, b), (c, d), (e, f), and (g, h) represent corresponding height to distance plot and 3D image in AFM of peptide 1, 2, 3, and 4, respectively.

## Spectra of Peptide Boc-Ant-L-Phg-OMe (1):

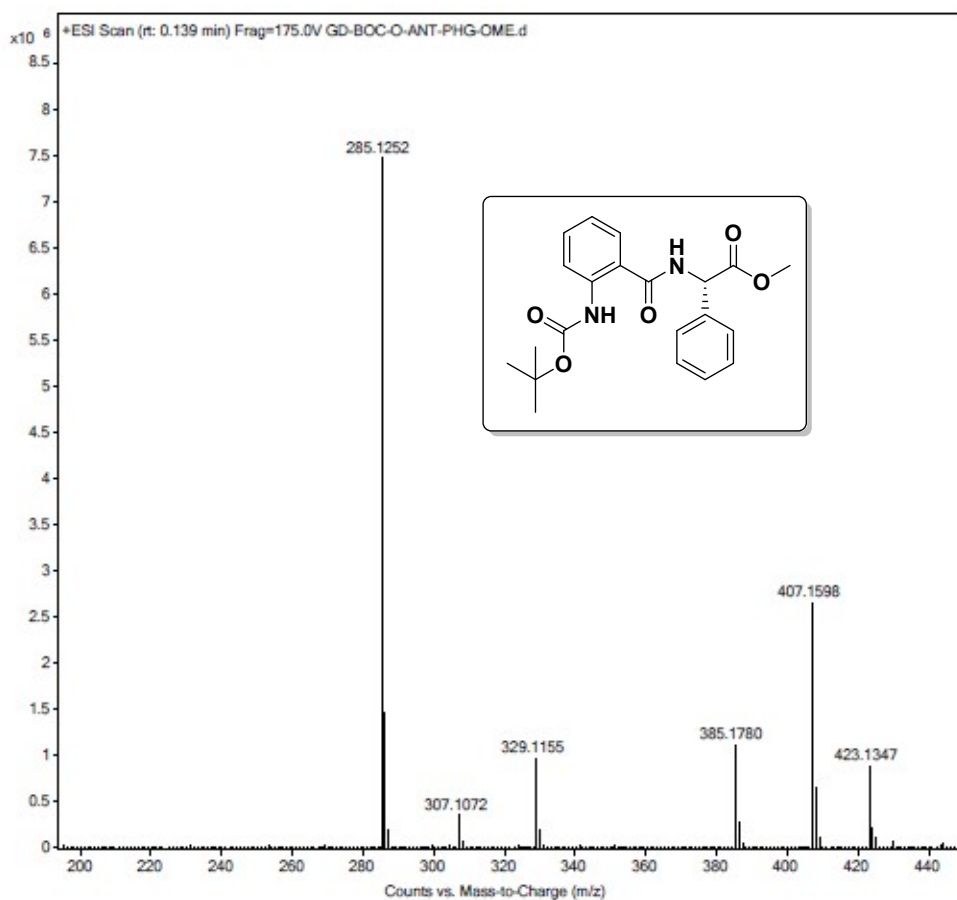

Figure S13. MS spectra of peptide Boc-Ant-L-Phg-OMe (1)

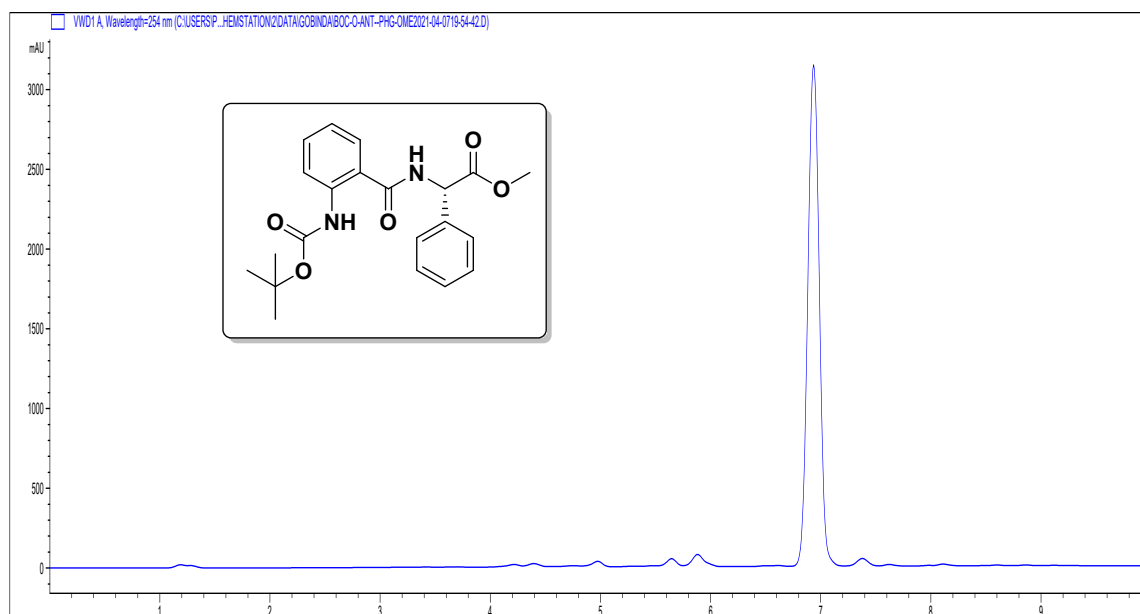

Figure S14. HPLC profile picture of purified peptide Boc-Ant-L-Phg-OMe (1)

GD-BOC-ANT-PHG-1H  
GD-BOC-ANT-PHG-1H

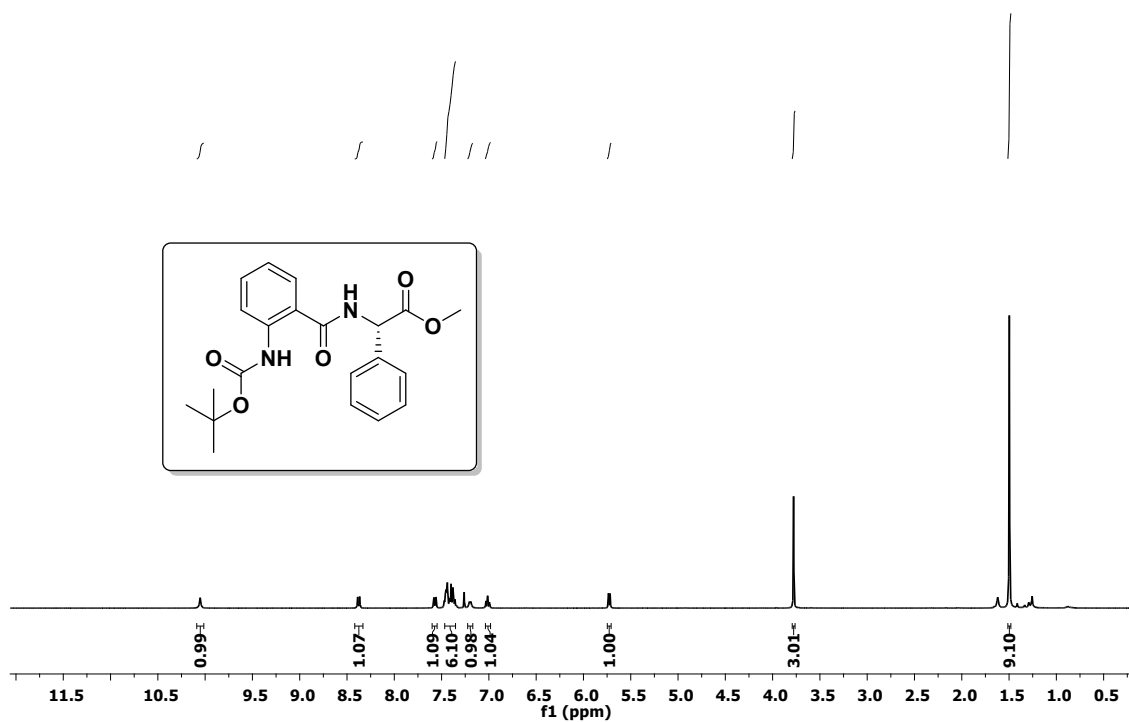

Figure S15.  $^1\text{H}$  NMR spectra of peptide **Boc-Ant-L-Phg-OMe (1)**

GD-BOC-ANT-PHG-13C  
GD-BOC-ANT-PHG-13C

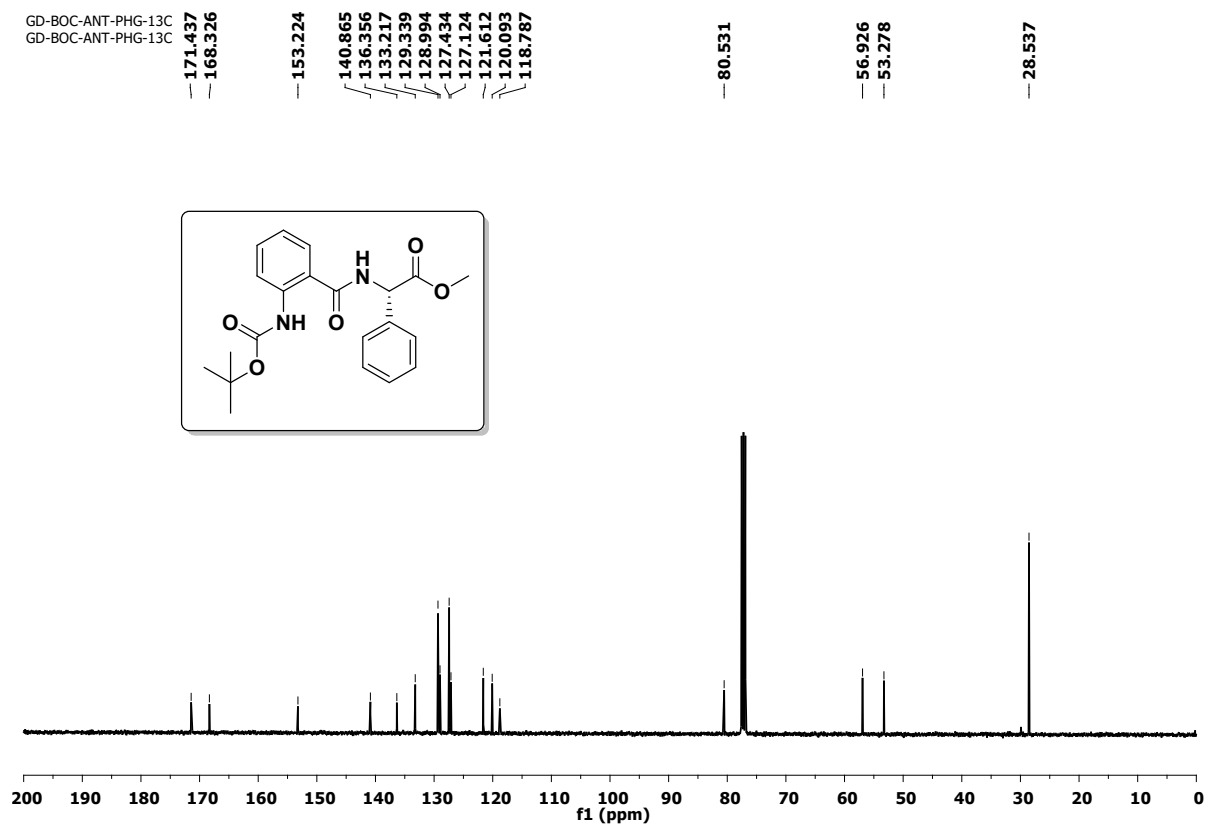

Figure S16.  $^{13}\text{C}$  NMR spectra of peptide **Boc-Ant-L-Phg-OMe (1)**

## Spectra of Peptide Boc-Ant-D-Phg-OMe (2):

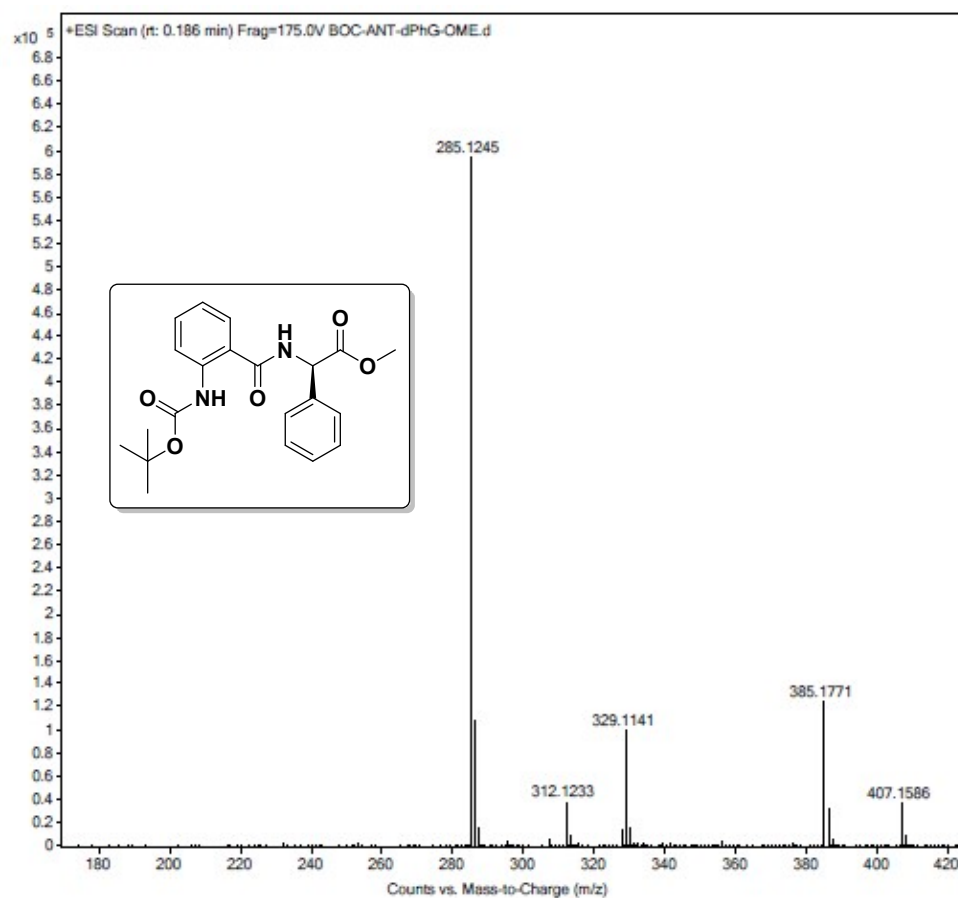

Figure S17. MS spectra of peptide Boc-Ant-D-Phg-OMe (2)

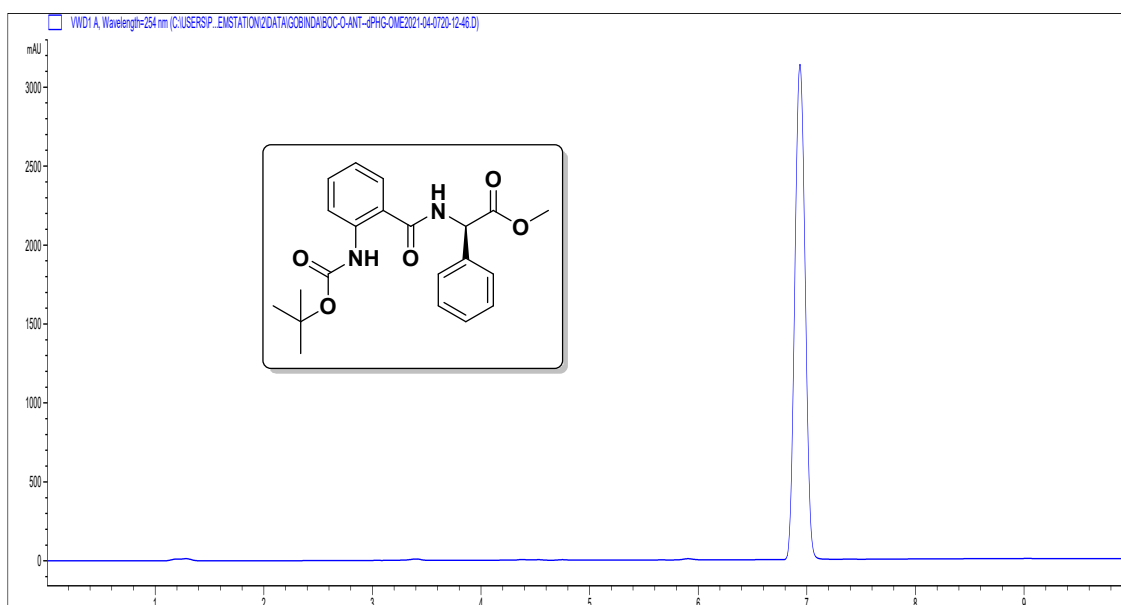

Figure S18. HPLC profile picture of purified peptide Boc-Ant-D-Phg-OMe (2)

GD-Boc-ANT-dPHG-1H  
GD-Boc-ANT-dPHG-1H

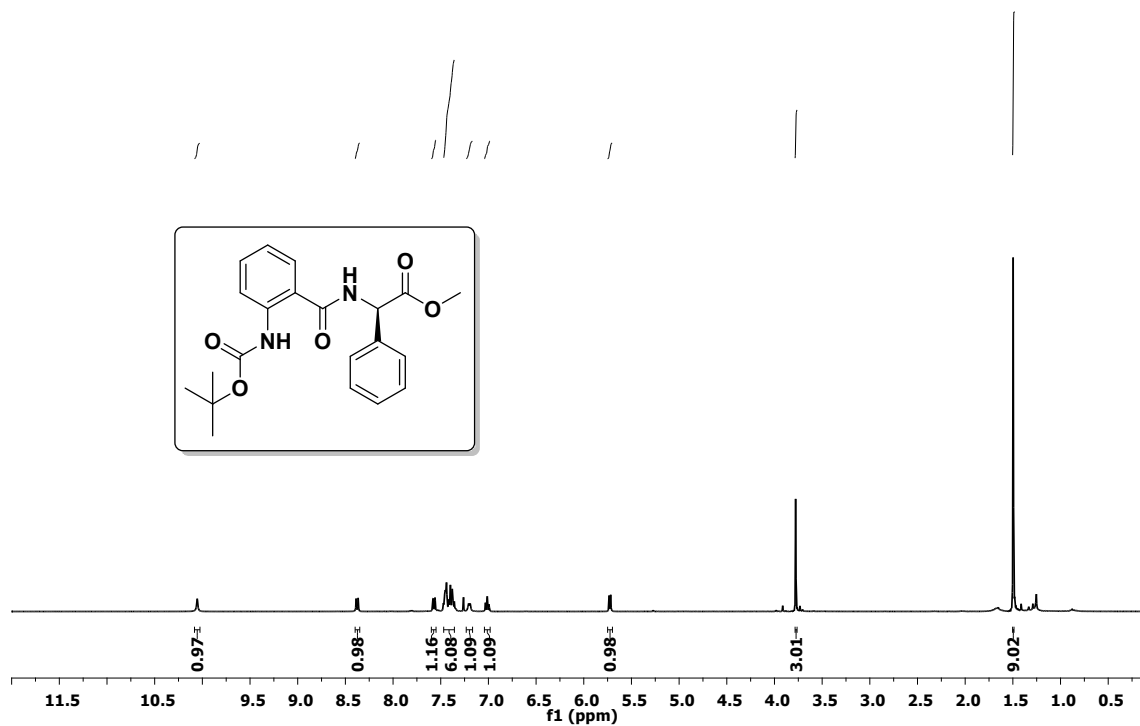

Figure S19. <sup>1</sup>H NMR spectra of peptide **Boc-Ant-D-Phg-OMe (2)**

GD-Boc-ANT-dPHG-13C  
GD-Boc-ANT-dPHG-13C

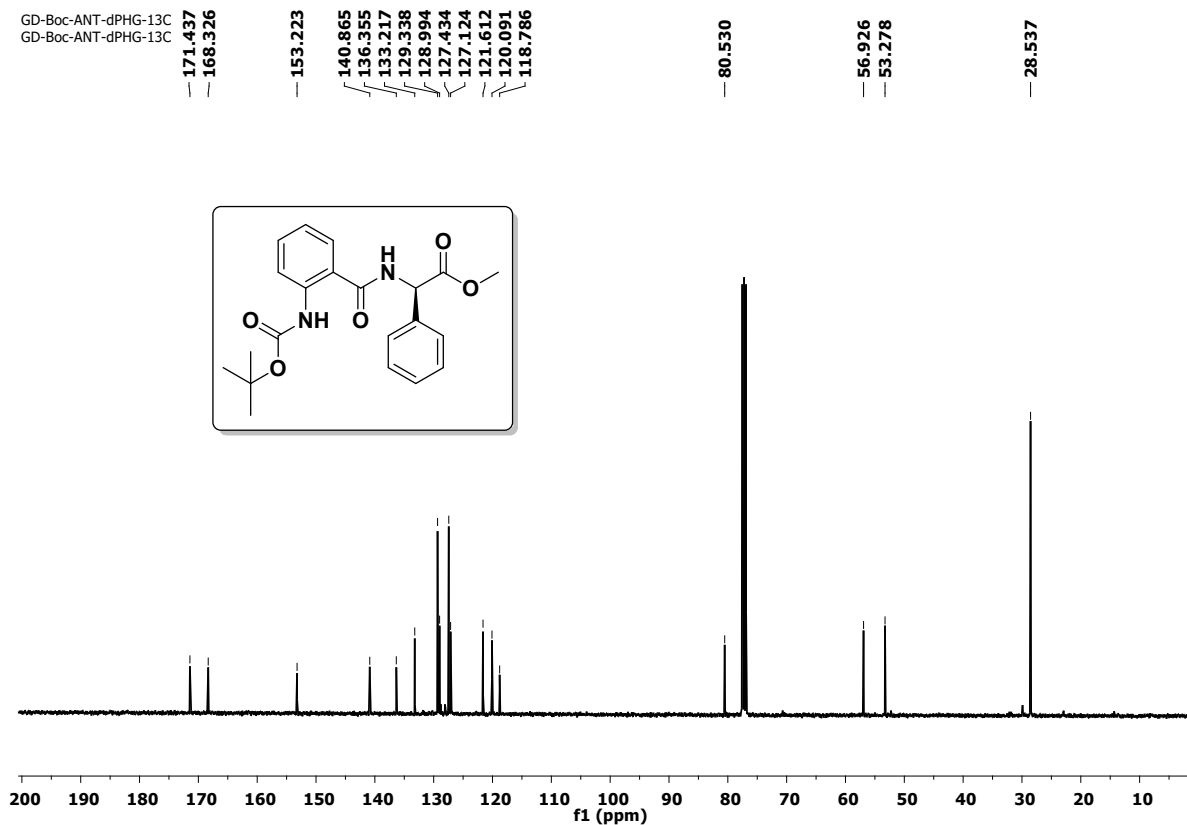

Figure S20. <sup>13</sup>C NMR spectra of peptide **Boc-Ant-D-Phg-OMe (2)**

## Spectra of Peptide Boc-L-Phg-Ant-OMe (3):

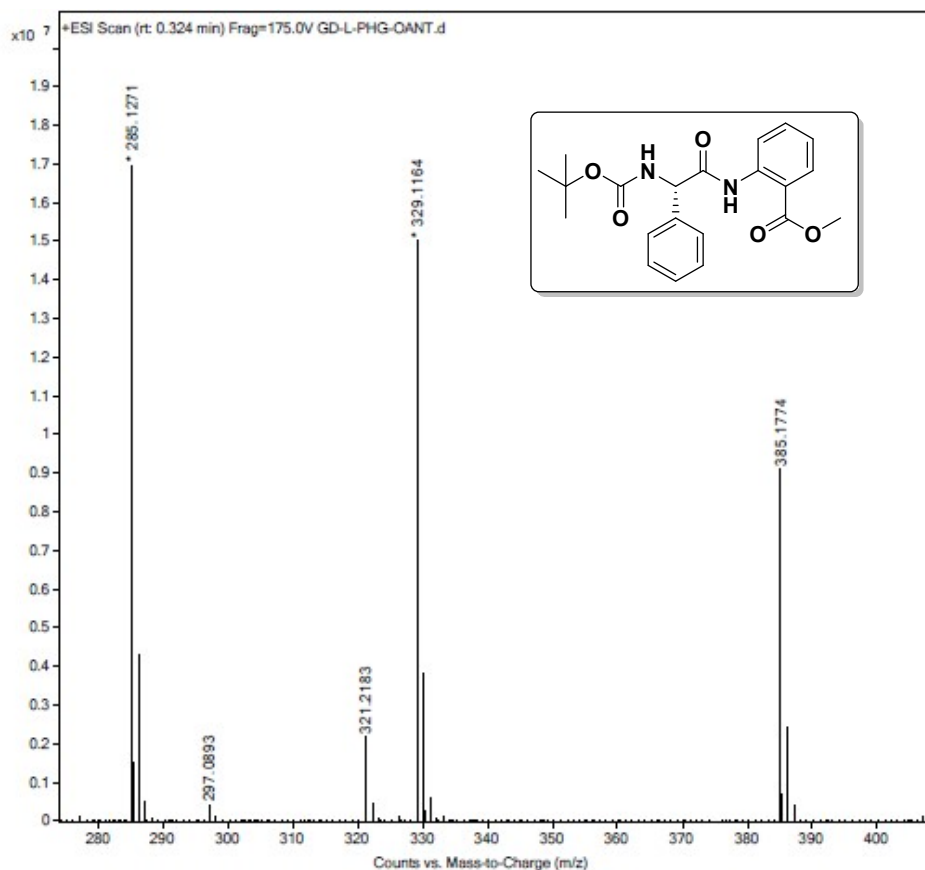

Figure S21. MS spectra of peptide Boc-L-Phg-Ant-OMe (3)

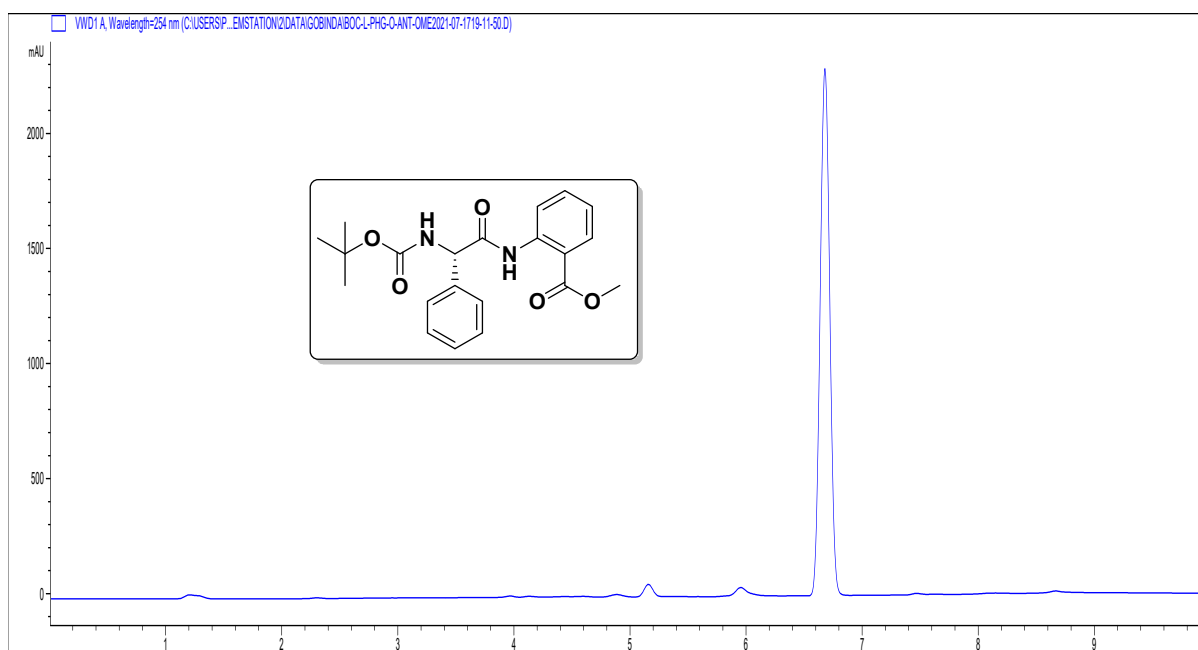

Figure S22. HPLC profile picture of purified peptide Boc-L-Phg-Ant-OMe (3)



L-PHG-OANT-1H.4.fid  
1H

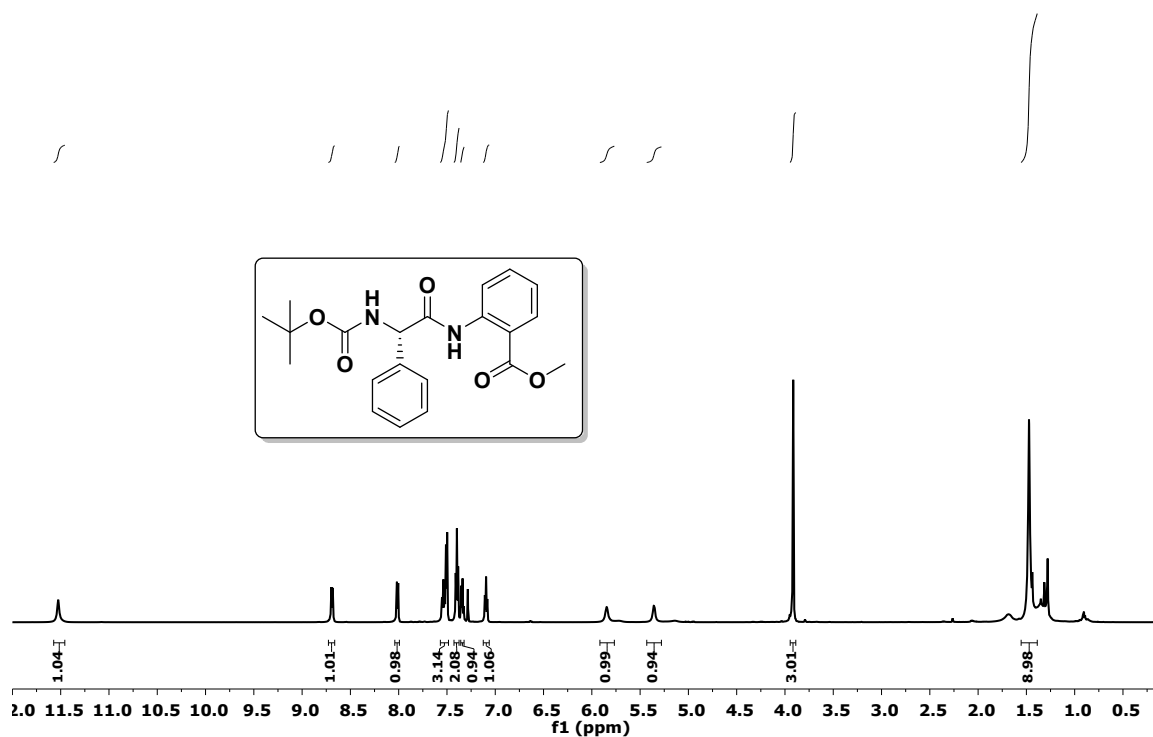

Figure S23. <sup>1</sup>H NMR spectra of peptide Boc-L-Phg-Ant-OMe (3)

L-PHG-OANT-13C.5.fid  
13C

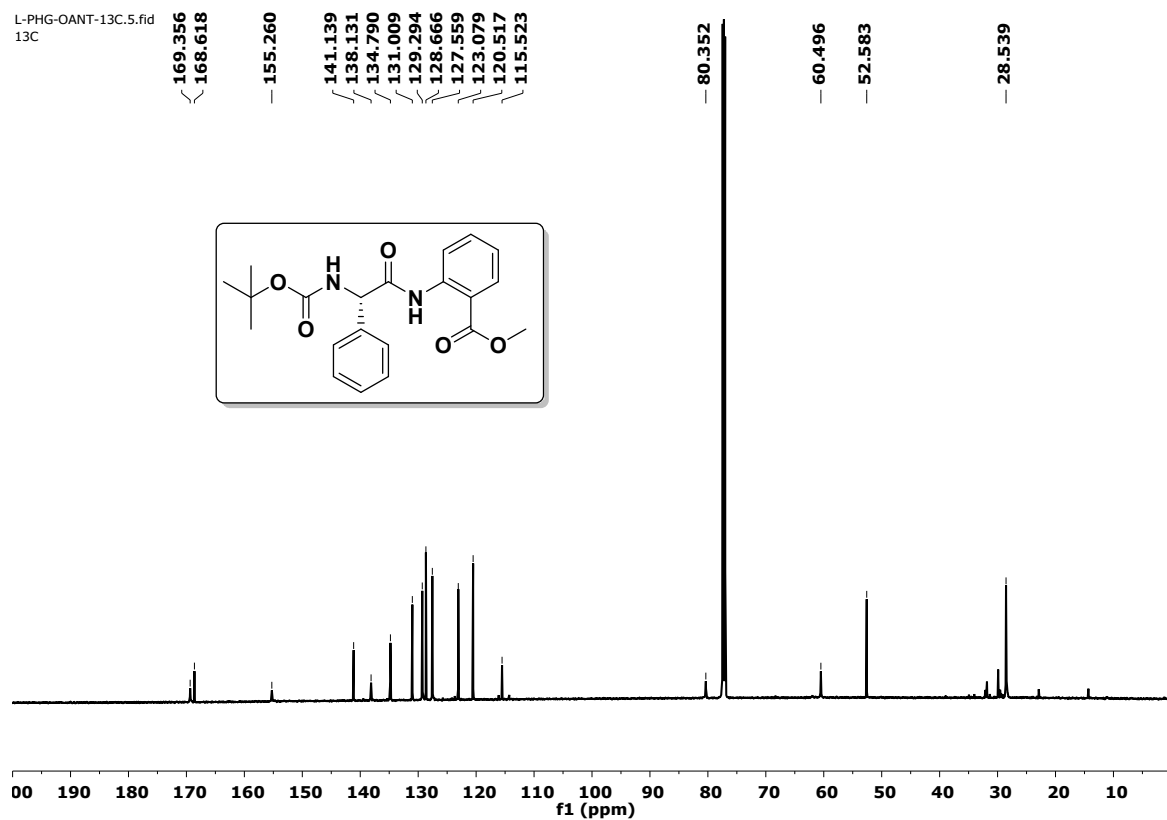

Figure S24. <sup>13</sup>C NMR spectra of peptide Boc-L-Phg-Ant-OMe (3)

## Spectra of Peptide Boc-D-Phg-Ant-OMe (4):

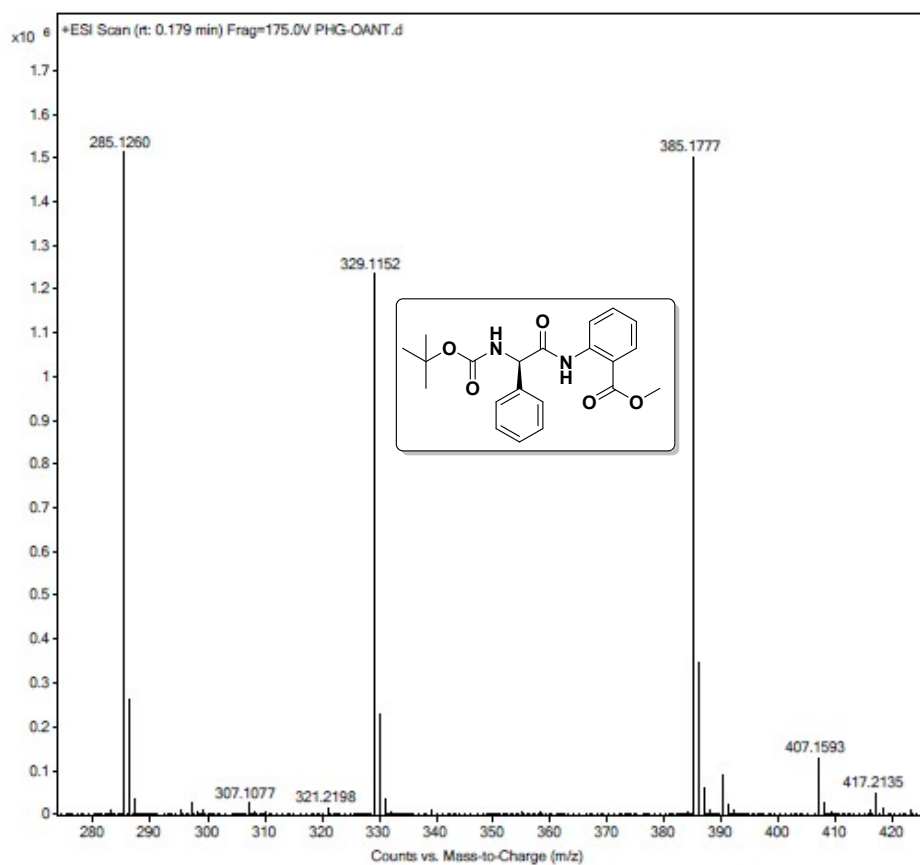

Figure S25. MS spectra of peptide **Boc-D-Phg-Ant-OMe (4)**

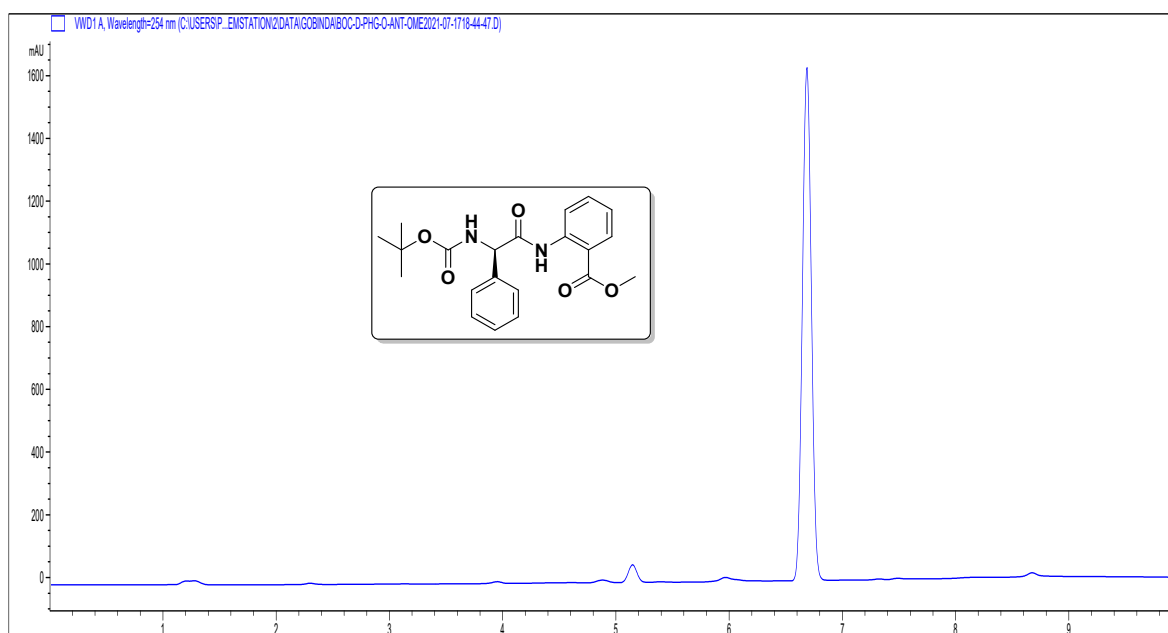

Figure S26. HPLC profile picture of purified peptide **Boc-D-Phg-Ant-OMe (4)**

GD-PHG-OANT-1H  
GD-PHG-OANT-1H

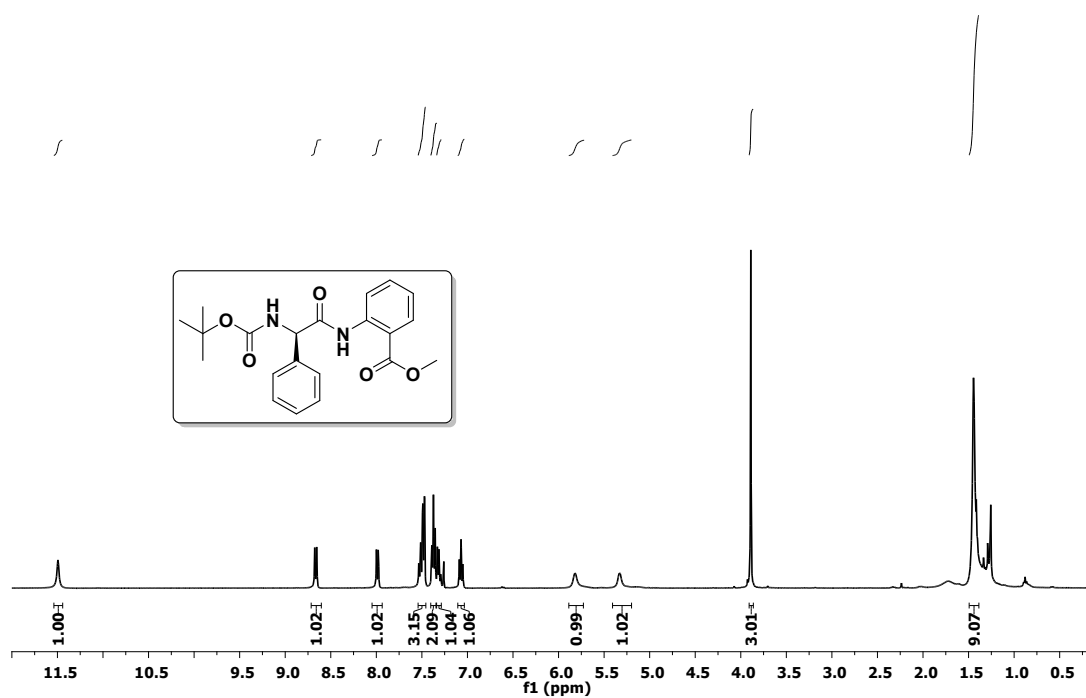

Figure S27. <sup>1</sup>H NMR spectra of peptide **Boc-D-Phg-Ant-OMe (4)**

GD-PHG-OANT-13C  
GD-PHG-OANT-13C

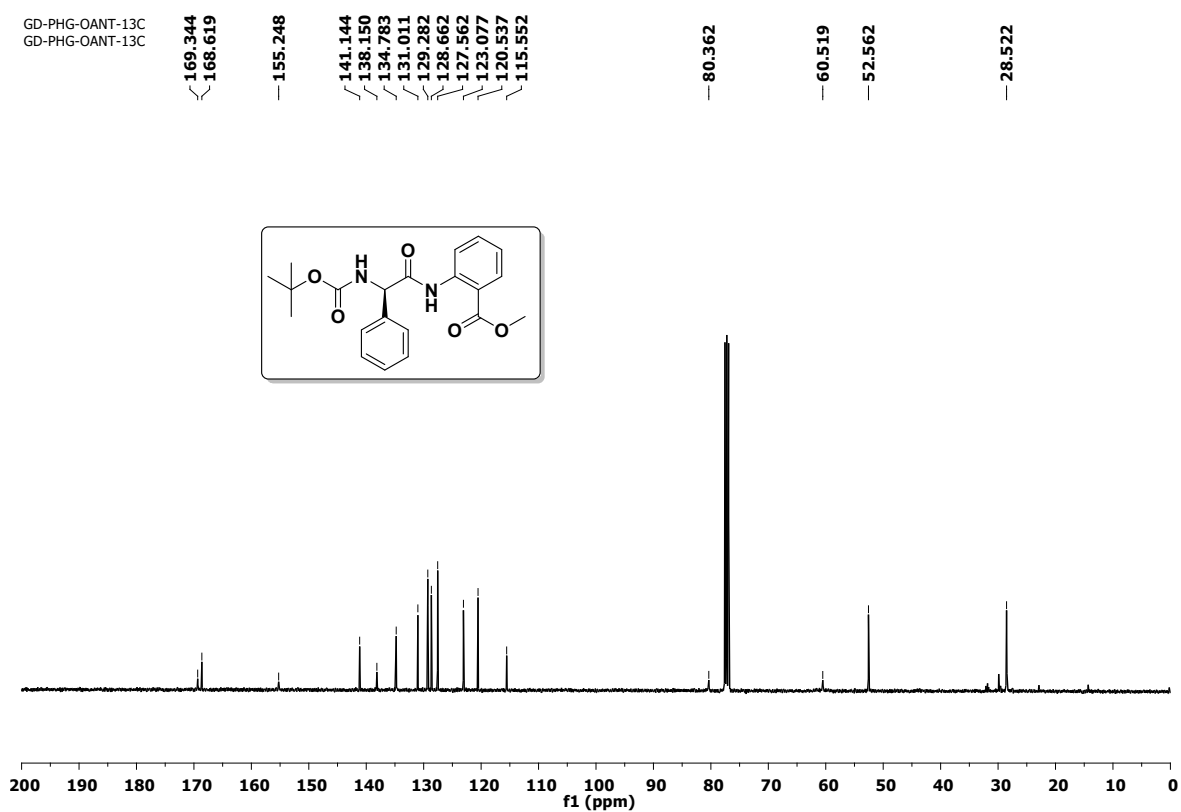

Figure S28. <sup>13</sup>C NMR spectra of peptide **Boc-D-Phg-Ant-OMe (4)**
